# Supplementary material
Source: Frontiers journal article supplement (https://www.frontiersin.org/articles/485415)
Supplement: Table_1.pdf [file Table_1.pdf]

## SOC Study Exercise Descriptions

| Exercise Name          | SC Domain Trained     | Number of Levels | Description                                                                                                          |
|------------------------|-----------------------|------------------|----------------------------------------------------------------------------------------------------------------------|
| Name that Feeling      | Affect Perception     | 16               | Select the label which correctly describes the facial expression of the rapidly presented target face (still images) |
| Emotion Motion         | Affect Perception     | 17               | Select the label which correctly describes the facial expression of the target face (video clip)                     |
| Voice Choice           | Affect Perception     | 16               | Select the label which correctly describes the target vocal affect (voice prosody)                                   |
| Second that Emotion    | Affect Perception     | 16               | A memory game for facial expression: match pairs of cards that express the same facial affect                        |
| Second that Intonation | Affect Perception     | 17               | A memory game for vocal expression: match pairs of cards that express the same vocal affect (prosody)                |
| Match that Feeling     | Affect Perception     | 20               | Select the face whose expression matches that of the rapidly presented target face                                   |
| Face It: Flashback     | Social Cue Perception | 16               | Correctly memorize an increasingly longer sequence of faces                                                          |
| Recognition            | Social Cue Perception | 17               | Select the target face from an array of faces presented from various angles.                                         |
| Face Facts             | Social Cue Perception | 13               | Memorize visually presented social facts about individuals presented serially                                        |
| Say What?              | Theory of Mind        | 13               | Decide how would a person respond in a given situation (audio scene)                                                 |
| What Happened?         | Theory of Mind        | 16               | Decide what most likely happened given the reaction in the clip                                                      |
| Social Scenes          | Theory of Mind        | 17               | Rate the likelihood of people's reactions and feelings in certain social situations                                  |
